# Supplementary material
Source: Springer Nature journal article supplement (https://www.springermedizin.de/resource/supplementary/12913_2013_3539_MOESM6_ESM.pdf/9533138)
Supplement: MOESM6 [file 9533138]

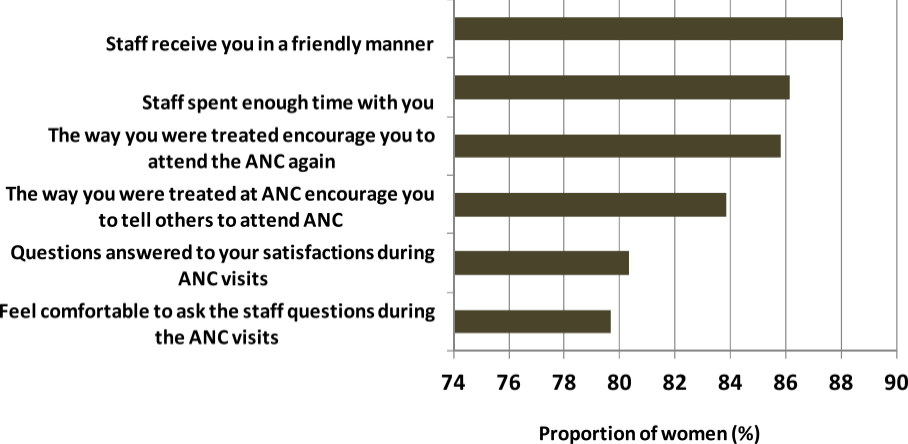

**Staff receive you in a friendly manner**

**Staff spent enough time with you**

**The way you were treated encourage you to attend the ANC again**

**The way you were treated at ANC encourage you to tell others to attend ANC**

**Questions answered to your satisfactions during ANC visits**

**Feel comfortable to ask the staff questions during the ANC visits**

**74 76 78 80 82 84 86 88 90**

**Proportion of women (%)**
